# Supplementary material for: Proposed Mobility Assessments with Simultaneous Full-Body Inertial Measurement Units and Optical Motion Capture in Healthy Adults and Neurological Patients for Future Validation Studies: Study Protocol
Source: MDPI journal article supplement (doi:10.3390/s21175833), 2021-08-30
Supplement: s1 [file s1]

## Supplementary material

*Supplementary Table 1. Information about the placement of the reflective markers and the corresponding name in the data files. See also supplementary figure 1.*

| Abbreviation used in the data files | Location                       | Exact description of the location                                                            |
|-------------------------------------|--------------------------------|----------------------------------------------------------------------------------------------|
| <b>Head</b>                         |                                |                                                                                              |
| l/rf_hd                             | front of the head              | Located approximately over the temple                                                        |
| l/rb_hd                             | back of the head               | Placed on the back of the head, roughly in a horizontal plane of the front head markers      |
| <b>Torso</b>                        |                                |                                                                                              |
| m_ster1                             | sternum                        | Placement mid of sternum, just caudal of SC joints                                           |
| m_ster2                             | sternum                        | Caudal and to the left of ster1                                                              |
| m_ster3                             | sternum                        | Caudal and to the right of ster1                                                             |
| <b>Arm</b>                          |                                |                                                                                              |
| l/r_sho                             | shoulder                       | Placed on the acromio-clavicular joint                                                       |
| l/r_ua                              | upper arm                      | Placed between elbow and shoulder (left side closer to elbow, right side closer to shoulder) |
| l/r_elbl                            | elbow                          | Placed on lateral epicondyle approximating elbow joint axis                                  |
| l/r_st_hem                          | humerus epicondylus medialis   | Placed on top of humerus epicondylus medialis                                                |
| l/r_frm                             | forearm                        | Placed between wrist and elbow (left side closer to wrist, right side closer to elbow)       |
| l/r_wrr                             | wrist, radial side             | On IMU above the radial styloid                                                              |
| l/r_wru                             | wrist, ulnar side              | On IMU above the ulnar styloid                                                               |
| l/r_hand                            | dorsal side of hand            | Dorsum of the hand just proximal of the head of the second metacarpal                        |
| <b>Pelvis</b>                       |                                |                                                                                              |
| l/r_asis                            | anterior superior iliac spine  | Placed directly on top of anterior superior iliac spine                                      |
| l/r_psis                            | posterior superior iliac spine | Placed directly on top of posterior superior iliac spine                                     |
| <b>Leg</b>                          |                                |                                                                                              |
| l/r_th                              | thigh                          | Marker cluster on lateral side of thigh, contains four markers                               |
| l/r_st_fem                          | femur epicondylus medialis     | Placed on the medial epicondyle of the knee                                                  |
| l/r_st_fel                          | femur epicondylus lateralis    | Placed on the lateral epicondyle of the knee                                                 |
| l/r_sk                              | shank                          | Marker cluster on lateral side of shank, contains 4 markers                                  |

|           |                    |                                                              |
|-----------|--------------------|--------------------------------------------------------------|
| l/r_st_mm | malleolus medialis | Placed on the malleolus medialis                             |
| l/r_ank   | ankle              | Placed on the malleolus lateralis                            |
| l/r_heel  | heel               | Placed on the calcaneous                                     |
| l/r_toe   | toe                | Placed on the shoe around the 2 <sup>nd</sup> middle phalanx |

*IMU = inertial measurement unit; l/r = marker is placed both on the left and right side; m = marker is placed around the midline of the body; st = indicates that this is a static marker that is only on the body during the static calibration trials.*

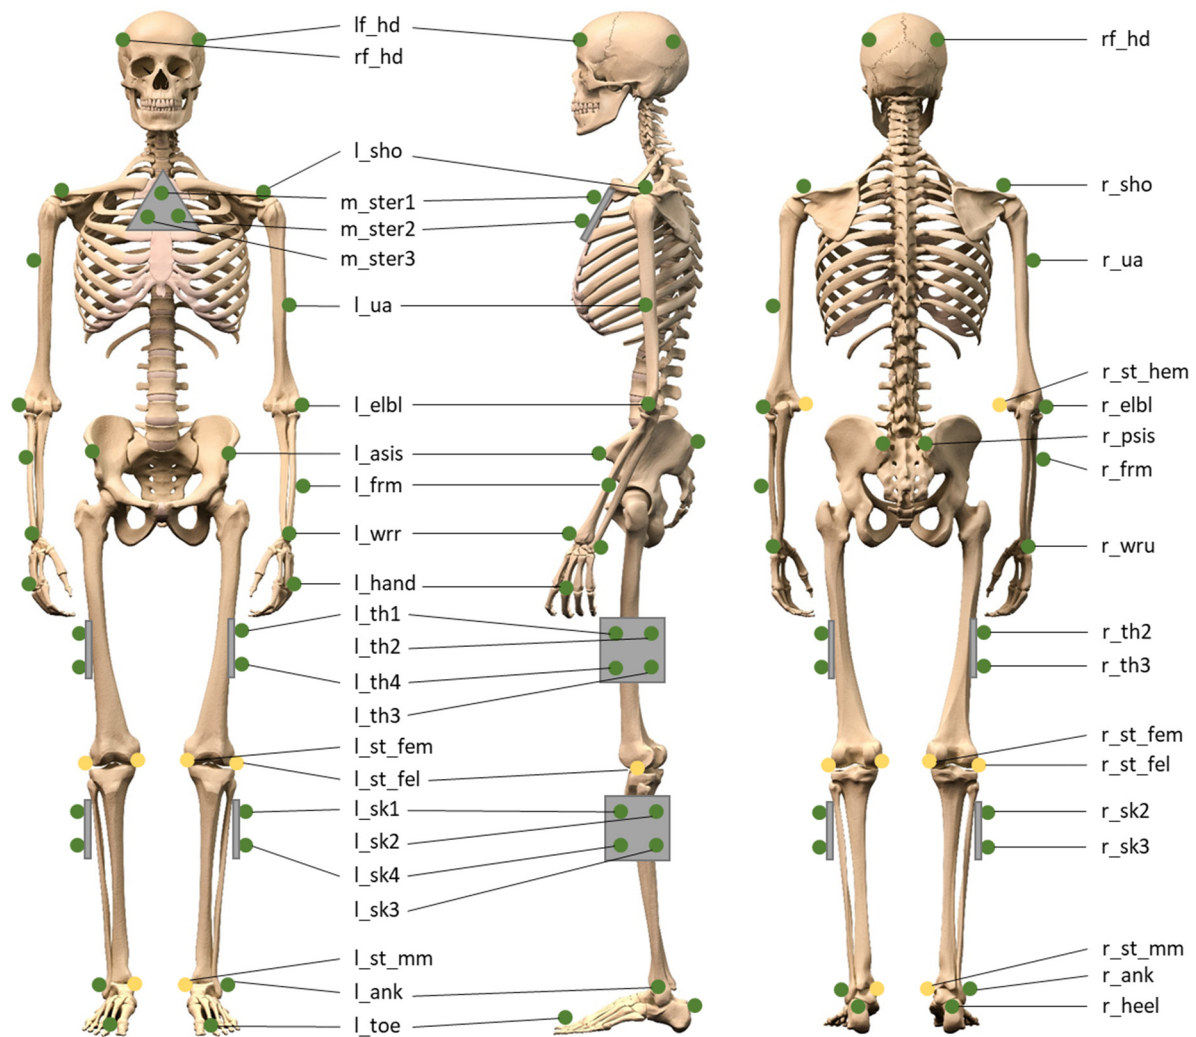

*Supplementary Figure 1. Placement of the reflective markers and the corresponding name in the data files. Full names and descriptions can be found in supplementary table 1.*

### **Treadmill split-belt protocol**

A subset of the healthy young adults will be asked to participate in two split-belt trials. The speed of the treadmill will be set to the comfortable walking speed from the first part of the first treadmill trial

at which the participant will walk for 60 s. Then the speed of one of the two belts will be reduced with 25% for 120 s. This will be followed by another 60 s with both belts at the same comfortable walking speed. This trial will then be repeated with a speed reduction of the other belt. The order in which belt the speed was reduced first will be randomized.

### Choreography assessment

The choreography assessment will exist of a series of movements related to the flexibility of the lower back. The participants will first perform a full flexion and extension of the back. Second, a right and left rotation of the back will be performed, which will be followed by a right and left lateral flexion of the back. Thereafter, the participants will pretend to lift an object from the floor (which is located in front and slightly to the right of the participant), they will lift this above the head and put it back on the floor (in front and slightly to the left of them). This is a movement that combines flexion and rotation of the back. Lastly, the participants will sit down and lift up the right leg while keeping it bended and pretend to put on a sock, which will then be repeated with the left leg.

*Supplementary Table 2. Filenames of the IMU and optical motion capture data.*

| Assessment                              | Filename (preceded by "omc_" for the optical motion capture data and "imu_" for the IMU data) |
|-----------------------------------------|-----------------------------------------------------------------------------------------------|
| Calibration                             | calibration_#                                                                                 |
| MDS-UPDRS III                           | updrs3_#                                                                                      |
| Treadmill walking tied belt             | treadmill                                                                                     |
| Treadmill walking split-belt            | splitbelt_left/splitbelt_right                                                                |
| SPPB – side by side stance              | balance_sbs                                                                                   |
| SPPB – semi-tandem stance               | balance_semi                                                                                  |
| SPPB – tandem stance                    | balance_tandem                                                                                |
| SPPB – first 4 m gait                   | gait1                                                                                         |
| SPPB – second 4 m gait                  | gait2                                                                                         |
| SPPB – 5 x chair rise                   | chairrise_fast                                                                                |
| Timed up and go                         | tug                                                                                           |
| Five time sit to stand test             | chairrise_preferred                                                                           |
| Choreography                            | choreo                                                                                        |
| Straight walking – slow                 | walk_slow                                                                                     |
| Straight walking – preferred            | walk_preferred                                                                                |
| Straight walking – fast                 | walk_fast                                                                                     |
| Sideways walking                        | sideways                                                                                      |
| Backwards walking                       | backwards                                                                                     |
| Obstacle – low                          | obstacle_low                                                                                  |
| Obstacle – high                         | obstacle_high                                                                                 |
| Slalom                                  | slalom                                                                                        |
| Single-task – simple reaction time task | reaction                                                                                      |
| Single-task – numerical stroop task     | stroop                                                                                        |
| Single-task – walking up and down       | walk_turn                                                                                     |

|                                                   |               |
|---------------------------------------------------|---------------|
| Dual-task – simple reaction time task and walking | walk_reaction |
| Dual-task – numerical stroop task and walking     | walk_stroop   |
| non-standardized activities of daily living       | home_part#    |

---

# = a number, sometimes this assessment is performed multiple times or in multiple parts.
